# Supplementary material for: Characterization of the heavy metal binding properties of periplasmic metal uptake protein CLas-ZnuA2
Source: Royal Society of Chemistry journal article supplement (doi:10.1039/c9mt00200f), 2019-12-19
Supplement: c9mt00200f1.pdf [file c9mt00200f1.pdf]

## Characterization of heavy metal binding properties of periplasmic metal uptake protein CLas-ZnuA2

Pranav Kumar,<sup>1</sup> Vikram Dalal,<sup>1</sup> Nidhi Sharma,<sup>1</sup> Sunil Kokane,<sup>2</sup> Dilip Kumar Ghosh,<sup>2</sup> Pravindra Kumar,<sup>1</sup> and Ashwani Kumar Sharma<sup>1\*</sup>

<sup>1</sup>Department of Biotechnology, Indian Institute of Technology Roorkee, Roorkee-247 667, India.

<sup>2</sup>Plant Virology Laboratory, ICAR-Central Citrus Research Institute, Nagpur-440 010, India.

### Supplementary figures and tables

**Table S1:** Metal coordination distances in Mn-specific available structures of Cluster A-I proteins. The values indicated by \* represents the higher than ideal coordination distance.

| Protein    | Metal ion        | Metal coordinating residues |        |        |       |        |       | Observed geometry | Ref. |
|------------|------------------|-----------------------------|--------|--------|-------|--------|-------|-------------------|------|
|            |                  | His39                       | His106 | Glu172 |       | Asp247 |       |                   |      |
|            |                  | NE2                         | NE2    | OE1    | OE2   | OD1    | OD2   |                   |      |
| CLas-ZnuA2 | Cd <sup>2+</sup> | 2.24                        | 2.23   | 2.23   | 2.20  | 2.25   | 2.23  | Octahedral        |      |
| CLas-ZnuA2 | Mn <sup>2+</sup> | 2.26                        | 2.23   | 2.31*  | 2.19  | 2.22   | 2.18  | Square pyramidal  | [1]  |
|            | Zn <sup>2+</sup> | 2.08                        | 2.07   | 2.51*  | 2.00  | 2.04   | 2.03  | Square pyramidal  | [2]  |
| PsaA       | Mn <sup>2+</sup> | 2.11                        | 2.15   | 2.08   | 2.39* | 2.43*  | 2.14  | Tetrahedral       | [3]  |
|            | Zn <sup>2+</sup> | 2.00                        | 2.01   | 2.05   | 2.60* | 2.03   | 2.84* | Tetrahedral       | [4]  |
| Sau-MntC   | Mn <sup>2+</sup> | 2.05                        | 2.07   | 2.28   | 2.77* | 2.32*  | 2.22  | Tetrahedral       | [5]  |

|          |                  |      |      |       |       |       |       |             |     |
|----------|------------------|------|------|-------|-------|-------|-------|-------------|-----|
|          | Zn <sup>2+</sup> | 2.05 | 2.10 | 2.56* | 2.07  | 2.05  | 2.54* | Tetrahedral | [6] |
| MtsA     | Fe               | 2.09 | 2.02 | 2.12  | 2.44* | 2.79* | 1.99  | Tetrahedral | [7] |
| Syn-MntC | Mn <sup>2+</sup> | 2.17 | 1.87 | 2.28  | 2.42* | 2.86* | 1.93  | Tetrahedral | [8] |

**Table S2:** Average values of RMSD, radius of gyration, SASA and intra-H bond of native **CLas-ZnuA2** native, **CLas-ZnuA2** -H106C Mutant and **CLas-ZnuA2** -D247C Mutant.

| S.No. | Compound                        | RMSD (Å) | Gyration (Å) | SASA (Å <sup>2</sup> ) | Intra-hydrogen number |
|-------|---------------------------------|----------|--------------|------------------------|-----------------------|
| 1     | <b>CLas-ZnuA2</b> - Native      | 0.96     | 19.38        | 12433.2                | 265.2                 |
| 2     | <b>CLas-ZnuA2</b> -H106C Mutant | 1.25     | 19.31        | 12286.3                | 262.1                 |
| 3     | <b>CLas-ZnuA2</b> -D247C Mutant | 1.38     | 19.48        | 12681.3                | 260.8                 |

**Table S3:** Kinetic parameters of **CLas-ZnuA2** interactions with different divalent metal ions: association rates, dissociation rates and equilibrium constants are given.

| Analyte (divalent metal) | k <sub>a1</sub> (M <sup>-1</sup> s <sup>-1</sup> ) | k <sub>d1</sub> (s <sup>-1</sup> ) | K <sub>a2</sub> (s <sup>-1</sup> ) | k <sub>d2</sub> (s <sup>-1</sup> ) | K <sub>D</sub> (M)     |
|--------------------------|----------------------------------------------------|------------------------------------|------------------------------------|------------------------------------|------------------------|
| Ba <sup>2+</sup>         | 8.2 x 10 <sup>-5</sup>                             | 50.54                              | 0.003511                           | 0.02283                            | 5.3 x 10 <sup>-5</sup> |
| Cd <sup>2+</sup>         | 1.8 x 10 <sup>8</sup>                              | 1571                               | 6.6 x 10 <sup>-4</sup>             | 0.003931                           | 7.1 x 10 <sup>-6</sup> |
| Co <sup>2+</sup>         | 1.2 x 10 <sup>4</sup>                              | 0.6472                             | 0.001923                           | 0.009397                           | 4.3 x 10 <sup>-5</sup> |
| Hg <sup>2+</sup>         | 1.1 x 10 <sup>4</sup>                              | 0.1420                             | 0.02584                            | 0.01579                            | 4.8 X 10 <sup>-6</sup> |

## References

- [1] N. Sharma, P. Selvakumar, S. Bhose, D.K. Ghosh, P. Kumar, A.K. Sharma, Crystal structure of a periplasmic solute binding protein in metal-free, intermediate and metal-bound states from *Candidatus Liberibacter asiaticus*, *J. Struct. Biol.* (2015).

doi:10.1016/j.jsb.2015.01.012.

- [2] N. Sharma, P. Selvakumar, G. Saini, A. Warghane, D.K. Ghosh, A.K. Sharma, Crystal structure analysis in Zn<sup>2+</sup>-bound state and biophysical characterization of CLas-ZnuA2, *Biochim. Biophys. Acta - Proteins Proteomics*. 1864 (2016) 1649–1657.  
doi:10.1016/j.bbapap.2016.08.016.
- [3] R.M. Couñago, M.P. Ween, S.L. Begg, M. Bajaj, J. Zuegg, M.L. O'Mara, M.A. Cooper, A.G. McEwan, J.C. Paton, B. Kobe, C.A. McDevitt, Imperfect coordination chemistry facilitates metal ion release in the Psa permease, *Nat. Chem. Biol.* (2014).  
doi:10.1038/nchembio.1382.
- [4] M.C. Lawrence, P.A. Pilling, V.C. Epa, A.M. Berry, A.D. Ogunniyi, J.C. Paton, The crystal structure of pneumococcal surface antigen PsaA reveals a metal-binding site and a novel structure for a putative ABC-type binding protein, *Structure*. (1998).  
doi:10.1016/S0969-2126(98)00153-1.
- [5] A. Gribenko, L. Mosyak, S. Ghosh, K. Parris, K. Svenson, J. Moran, L. Chu, S. Li, T. Liu, V.L. Woods, K.U. Jansen, B.A. Green, A.S. Anderson, Y. V. Matsuka, Three-dimensional structure and biophysical characterization of *Staphylococcus aureus* cell surface antigen-manganese transporter MntC, *J. Mol. Biol.* (2013). doi:10.1016/j.jmb.2013.06.033.
- [6] S. Ahuja, L. Rougé, D.L. Swem, J. Sudhamsu, P. Wu, S.J. Russell, M.K. Alexander, C. Tam, M. Nishiyama, M.A. Starovasnik, C.M. Koth, Structural analysis of bacterial ABC transporter inhibition by an antibody fragment, *Structure*. (2015).  
doi:10.1016/j.str.2015.01.020.
- [7] X. Sun, H.M. Baker, R. Ge, H. Sun, Q.Y. He, E.N. Baker, Crystal structure and metal binding properties of the lipoprotein MtsA, responsible for iron transport in *Streptococcus*

pyogenes, Biochemistry. (2009). doi:10.1021/bi900552c.

- [8] V. Rukhman, R. Anati, M. Melamed-Frank, N. Adir, The MntC crystal structure suggests that import of Mn<sup>2+</sup> in cyanobacteria is redox controlled, J. Mol. Biol. (2005). doi:10.1016/j.jmb.2005.03.006.

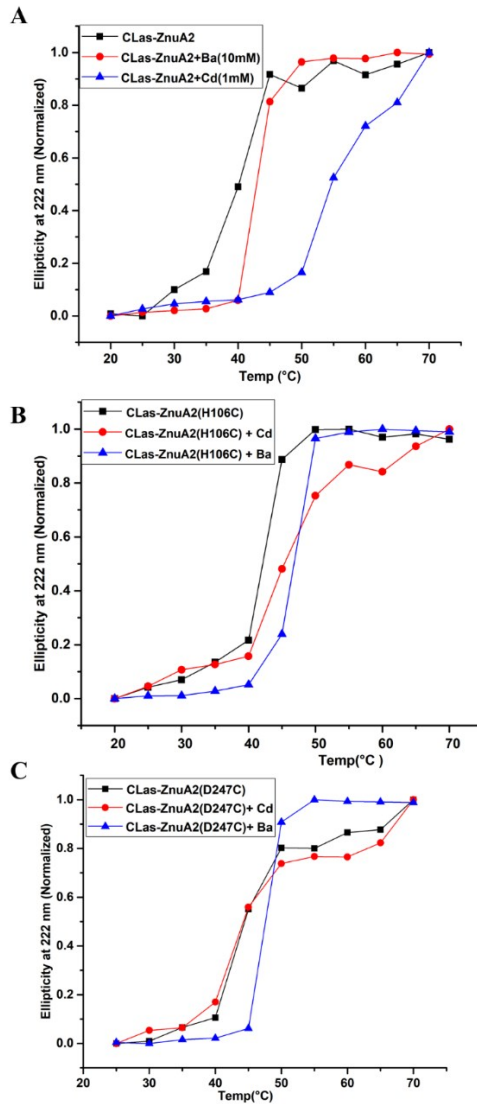

**Figure S1. Circular dichroism studies (A), (B) and (C)** Shows thermal denaturation of wild-type, mutant H106C and D247C monitored by CD spectroscopy at 222 nm in presence of Cd<sup>2+</sup> and Ba<sup>2+</sup> respectively.
